# Supplementary material for: Combining Wolbachia-induced sterility and virus protection to fight Aedes albopictus-borne viruses
Source: PubMed Central journal article supplement (PMC6066253; doi:10.1371/journal.pntd.0006626), 2018-07-18

*Ae. albopictus* at day 7 post-infection with CHIKV

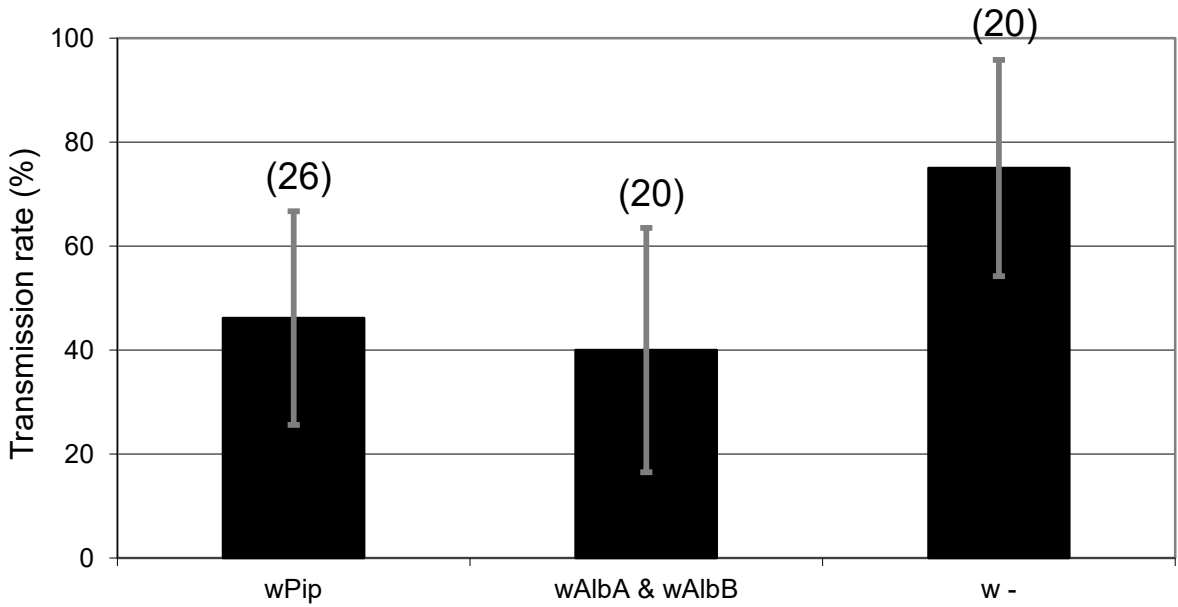

*Ae. albopictus* at day 14 post-infection with CHIKV

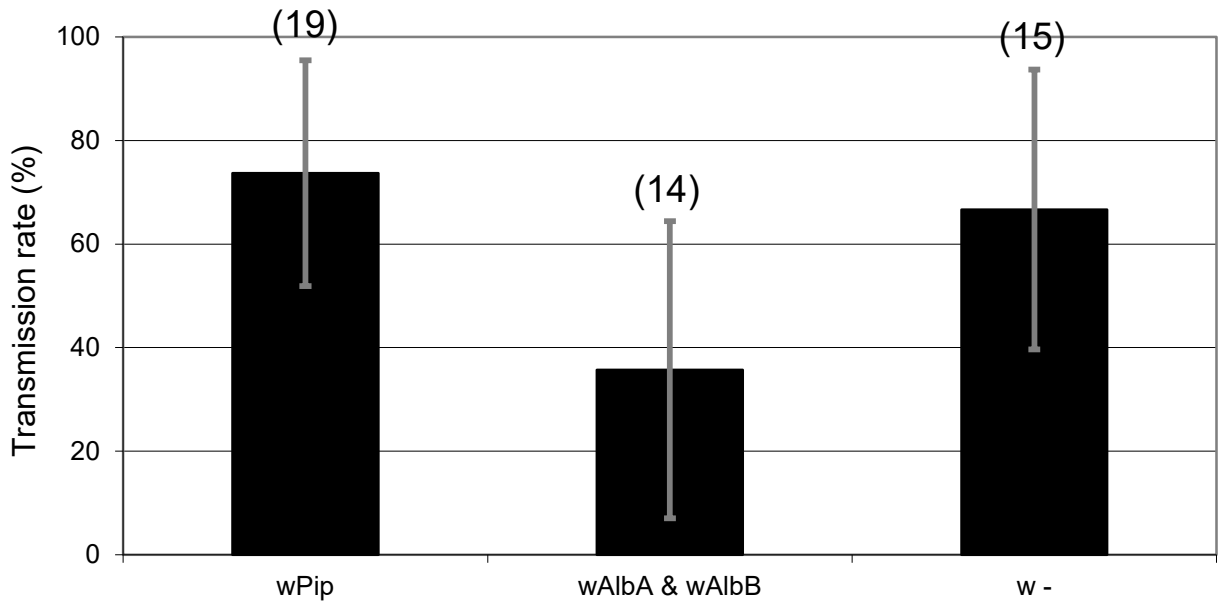

Supplement: pntd.0006626.s001.pdf [file pntd.0006626.s001.pdf]
