# Supplementary material for: Combining Wolbachia-induced sterility and virus protection to fight Aedes albopictus-borne viruses
Source: PubMed Central journal article supplement (PMC6066253; doi:10.1371/journal.pntd.0006626), 2018-07-18
Supplement: pntd.0006626.s002.pdf [file pntd.0006626.s002.pdf]

10 20 30 40 50  
 wsp wMel AF020064.1 A G T G A T G A A G A A A C T A G C T A C T A C G T T C G T T T G C A A T A C A A C G G T G A A T T  
 ARwP Mel-amplicon A G T G A T G A A G A A A C T A G C T A C T A C G T T C G T T T G C A A T A C A A C G G T G A A T T  
 wsp wPip AF301010 T A G C T A C T A T G T T C G T T T G C A A T A T A A T G G T G A A G T

60 70 80 90 100  
 wsp wMel AF020064.1 T T T A C C T C T T T T C A C A A A A G T T G A T G G T A T T A C C T A T A A G A A A G A C A A G A  
 ARwP Mel-amplicon T T T A C C T C T T T T C A C A A A A G T T G A T G G T A T T A C C T A T A A G A A A G A C A A G A  
 wsp wPip AF301010 T T T A C C T T T T A A A A C A A G A A T T G A C G G C A T T G A A T A T A A A A A A G G A A C C G

110 120 130 140 150  
 wsp wMel AF020064.1 G T G A T T A C A G T C C A T T A A A A C C A T C T T T T A T A G C T G G T G G T G G T G C A T T T  
 ARwP Mel-amplicon G T G A T T A C A G T C C A T T A A A A C C A T C T T T T A T A G C T G G T G G T G G T G C A T T T  
 wsp wPip AF301010 A A G T T C A T G A T C C T T T A A A A G C A T C T T T T A T G G C T G G T G G T G C T G C A T T T

160 170 180 190 200  
 wsp wMel AF020064.1 G G T T A C A A A A T G G A C G A C A T C A G G G T T G A T G T T G A A G G A G T T T A T T C A T A  
 ARwP Mel-amplicon G G T T A C A A A A T G G A C G A C A T C A G G G T T G A T G T T G A A G G A G T T T A T T C A T A  
 wsp wPip AF301010 G G T T A T A A A A T G G A C G A T A T C A G G G T T G A T G T T G A A G G A G T T T A C T C A C A

210 220 230 240 250  
 primer 308F  
 wsp wMel AF020064.1 C C T A A A C A A A A A T G A T G T T A A A G A T G T A A C A T T T G A C C C A G C A A A T A C T A  
 ARwP Mel-amplicon C C T A A A C A A A A A T G A T G T T A A A G A T G T A A C A T T T G A C C C A G C A A A T A C T A  
 wsp wPip AF301010 A C T A A A C A A A A A C G A C G T T A G T G G T G C A A A C A T T T A C T C C A A C A A - - - C T G

260 270 280 290 300  
 wsp wMel AF020064.1 T T G C A G A C A G T G T A A C A G C A A T T T C A G G A T T A G T G A A C G T G T A T T A C G A T  
 ARwP Mel-amplicon T T G C A G A C A G T G T A A C A G C A A T T T C A G G A T T A G T G A A C G T G T A T T A C G A T  
 wsp wPip AF301010 T T G C A A A C A G T G T G G C A G C A T T T T C A G G A T T G G T A A C G T T A T T A C G A T

310 320 330 340 350  
 wsp wMel AF020064.1 A T A G C A A T T G A A G A T A T G C C T A T C A C T C C A T A C A T T G G T G T T G G T G T T G G  
 ARwP Mel-amplicon A T A G C A A T T G A A G A T A T G C C T A T C A C T C C A T A C A T T G G T G T T G G T G T T G G  
 wsp wPip AF301010 A T A G C A A T T G A A G A T A T G C C T A T C A C T C C A T A C A T T G G T G T T G G T G T T G G

360 370 380 390 400  
 primer QAreV2  
 wsp wMel AF020064.1 T G C A G C G T A T A T T A G C A C T C C T T T G G A A C C C G C T G T G A A T G A T C A A A A A A  
 ARwP Mel-amplicon T G C A G C G T A T A T T A G C A C T C C T T T G G A A C C C G C T G T G A A T G A T C A A A A A A  
 wsp wPip AF301010 T G C A G C A T A T A T C A G C A A T C C T T T C A G A A G C T A G T G C A G T T A A A G A T C A A A

410 420 430 440 450  
 wsp wMel AF020064.1 G T A A A T T T G G T T T G C T G G Y C A A G T A A A A G C T G G T G T T A G T T A T G A T G T A  
 ARwP Mel-amplicon G T A A A T T T G G T T T G C T G G T C A A G T A A A A G C T G G T G T T A G T T A T G A T G T A  
 wsp wPip AF301010 A A G G A T T T G G T T T G C T T A T C A A G C A A A A G C T G G T G T T A G T T A T G A T G T A

460 470 480 490 500  
 wsp wMel AF020064.1 A C T C C A G A A G T C A A A C T T T A T G C T G G A G C T C G T T A T T T C G G T T C T T A T G G  
 ARwP Mel-amplicon A C T C C A G A A G T C A A A C T T T A T G C T G G A G C T C G T T A T T T C G G T T C T T A T G G  
 wsp wPip AF301010 A C C C C A G A A T C A A A C T T T A T G C T G G T G C T C G T T A T T T G G T T C T T A T G G

510 520 530 540 550  
 wsp wMel AF020064.1 T G C T A A T T T T G A T G G A A A A A A C A G A T C C T A A A A A T T C A A C C G G A C A G G  
 ARwP Mel-amplicon T G C T A A T T T T G A T G G A A A A A A C A G A T C C T A A A A A T T C A A C C G G A C A G G  
 wsp wPip AF301010 T G C T A G T T T T A A T - - - A A A G A A G C A G T A T C - - - - - - - - - - - - - - - A G

560 570 580 590 600  
 wsp wMel AF020064.1 C T G C T G A T G C A G G C G C A T A C A A A G T T C T T T A C A G C A C T G T T G G T G C A G A A  
 ARwP Mel-amplicon C T G C T G A T G C A G G C G C A T A C A A A G T T C T T T A C A G C A C T G T T G G T G C A G A A  
 wsp wPip AF301010 C T A C T A A A G - A G A T - - - - C A A T G T C C T T T A C A G C G C T G T T G G T G C A G A A

610 620 630 640 650  
 wsp wMel AF020064.1 G C T G G A G T A G C G T T T A A T T T C T A G T C T A T C A G T C T T G T T A T C C C A G T G  
 ARwP Mel-amplicon G C T G G A G T A G C G T T T A A T T T T A  
 wsp wPip AF301010 G C T G G A G T A G C G T T T A A T T T Y T A G T C T A T C T C A G T C T T G T T A T C C C A G T G
