# Supplementary material for: Combining Wolbachia-induced sterility and virus protection to fight Aedes albopictus-borne viruses
Source: PubMed Central journal article supplement (PMC6066253; doi:10.1371/journal.pntd.0006626), 2018-07-18
Supplement: pntd.0006626.s003.pdf [file pntd.0006626.s003.pdf]

**S1 Table.** Assembling of plasmid pBS-M-P-act was performed by cloning fragments of the sequences of interest using total DNA extracts as PCR templates. The sequence analysis of the cloned sequences from the reared species listed below revealed a complete homology with the corresponding genes in database.

| Gene fragment   | Donor species used for cloning | Accession number of the corresponding gene in database | Percentage of homology determined by sequencing of the gene fragment |
|-----------------|--------------------------------|--------------------------------------------------------|----------------------------------------------------------------------|
| <i>Actin</i>    | <i>Aedes albopictus</i>        | DQ657949                                               | 100 %                                                                |
| <i>wMel-wsp</i> | <i>Drosophila melanogaster</i> | AF020064                                               | 100 %                                                                |
| <i>wPip-wsp</i> | <i>Culex pipiens pipiens</i>   | AF301010                                               | 100 %                                                                |
